# Supplementary material
Source: ML conference proceedings conference paper supplement (https://proceedings.mlr.press/v32/hsiehb14.html)
Supplement: Supplementary file 1 [file hsiehb14-supp.pdf]

## 6. Appendix

### 6.1. Proof sketch for Theorem 2

This theorem is proved in (Mazumder et al., 2010) by considering the auxilliary function

$$\begin{aligned} Q(X, Y) &= \frac{1}{2} \|\Pi_{\Omega}(A) + \Pi_{\Omega}^{\perp}(Y) - X\|_F^2 + \lambda \|X\|_* \\ &= F(X) + \frac{1}{2} \|\Pi_{\Omega}^{\perp}(Y - X)\|_F^2, \end{aligned}$$

for which  $Q(X, Y) \geq F(X)$  and  $Q(X, X) = F(X)$ . We can minimize the auxiliary function by noting that the minimum with respect to  $Y$  for fixed  $X$  is  $Y = X$  and for fixed  $Y$  the minimum with respect to  $X$  is  $X = S_{\lambda}(\Pi_{\Omega}(A) + \Pi_{\Omega}^{\perp}(Y))$ . Alternating the minimization gives the iteration in the theorem. This algorithm is known as Soft-Impute.

### 6.2. Proof sketch for Theorem 3

For the regression problem we can form a different auxiliary function. If  $cI \succ A^{\top}A = f''(X)$  then  $-\frac{1}{2}\|AX - AY\|_F^2 + \frac{c}{2}\|X - Y\|_F^2 \geq 0$  for all  $X, Y$  and the auxilliary function

$$\begin{aligned} Q(X, Y) &= \frac{1}{2} \|AX - B\|_F^2 - \frac{1}{2} \|A(X - Y)\|_F^2 \\ &\quad + \frac{c}{2} \|X - Y\|_F^2 + \lambda \|X\|_* \\ &= \frac{c}{2} \|X - Y - \frac{1}{c}(A^{\top}B - A^{\top}AY)\|_F^2 \\ &\quad + \lambda \|X\|_* + \text{const} \\ &= c \left( \frac{1}{2} \|X^{\top} - (Y - \frac{1}{c}f'(Y))\|_F^2 + \frac{\lambda}{c} \|X\|_* \right) \\ &\quad + \text{const} \end{aligned}$$

satisfy  $Q(X, Y) \geq F(X)$  and  $Q(X, X) = F(X)$ . For fixed  $Y_k$  the minimum over  $X$  is  $X_{k+1} = S_{\lambda/c}(Y_k - \frac{1}{c}f'(Y_k))$  and for fixed  $X_k$  the minimum over  $Y$  is  $Y_k = X_k$ . This auxilliary function is constructed completely analogously to the  $\ell_1$  case, for which global convergence is formally proved in (Daubechies et al., 2004).

### 6.3. Proof of Theorem 4

*Proof.* If  $\mathbf{u} \in U_A^{\perp}$ , then (1)  $U^{\top}\mathbf{u} = 0$ , which implies  $\mathbf{u}^{\top}X = 0$ ; (2)  $U_G^{\top}\mathbf{u} = 0$ , which implies  $|\mathbf{u}^{\top}(X - \nabla f(X))\mathbf{v}| < \lambda$  for any  $\mathbf{v}$  (by the definition of soft-thresholding operator  $S$ ). Combining (1) and (2) we have  $\mathbf{u}\mathbf{v}^{\top} \in \mathcal{F}$  for all  $\mathbf{v}$  if  $\mathbf{u} \in U_A^{\perp}$ . By the same argument we can prove  $\mathbf{u}\mathbf{v}^{\top} \in \mathcal{F}$  for all  $\mathbf{u}$  if  $\mathbf{v} \in V_A^{\perp}$ .  $\square$

### 6.4. Proof of Theorem 6

*Proof.* Since  $S$  is positive definite it has an eigenvalue decomposition  $S = P\Sigma P^{\top}$  with  $\Sigma \succ 0$  a diagonal

matrix. Therefore the SVD of  $X$  can be written  $X = (UP)\Sigma(VP)^{\top}$  and the sub-differential is

$$\partial\|X\|_* = \{UV^{\top} + W : U^{\top}W = 0, WV = 0, \|W\|_2 \leq 1\},$$

independent of  $S$  since  $(UP)(VP)^{\top} = UV^{\top}$ .  $\square$

### 6.5. Proof of Theorem 7

*Proof.* Assume  $X^* = U^*\Sigma^*V^*$  is the reduced SVD of  $X^*$ . Since  $X^*$  is the global optimum,

$$\begin{aligned} X^* &= S_{\lambda}(X^* - \nabla f(X^*)) \\ &= \bar{U}^*(\bar{\Sigma}^* - \lambda I)_+(\bar{V}^*)^{\top}. \end{aligned} \quad (15)$$

If there are  $k$  singular values in  $\bar{\Sigma}^*$  larger than  $\lambda$ , then it is clear that the first  $k$  columns of  $\bar{U}^*$  is  $U^*$ , and the first  $k$  columns of  $\bar{V}^*$  is  $V^*$ . By our assumption,  $\Sigma_{ii} \neq \lambda$  for all  $i$ , so we can assume  $\Sigma_{kk} > \lambda$  and  $\Sigma_{k+1, k+1} < \lambda - \epsilon$  with some  $\epsilon > 0$ .

We consider the set

$$\mathcal{Z} \equiv \{(\mathbf{u}, \mathbf{v}) \mid \mathbf{u} \in (U^*)^{\perp} \text{ or } \mathbf{v} \in (V^*)^{\perp}\}.$$

For  $(\mathbf{u}, \mathbf{v}) \in \mathcal{Z}$ ,  $\mathbf{u}^{\top}X^*\mathbf{v} = 0$ , so

$$|\mathbf{u}^{\top}(X^* - \nabla f(X^*))\mathbf{v}| = |\mathbf{u}^{\top}\nabla f(X^*)\mathbf{v}| < \lambda - \epsilon.$$

Since the sequence  $X_t$  generated by Algorithm 1 converges to the global optimum  $X^*$ , there exists a  $T$  such that

$$\|\nabla f(X_t) - \nabla f(X^*)\| < \epsilon \quad (16)$$

and

$$|\mathbf{u}^{\top}\nabla f(X_t)\mathbf{v}| < \lambda \quad (17)$$

for all  $t > T$  and any  $(u, v) \in \mathcal{Z}$ . Now for any  $(u, v) \in \mathcal{Z}$  we consider two cases:

1. If  $\mathbf{u}^{\top}X_{t-1}\mathbf{v} \neq 0$ , then  $\mathbf{u} \in (U_A)_{t-1}$  and  $\mathbf{v} \in (V_A)_{t-1}$ . Since we exactly solve the sub-problem (7) and we already know  $|\mathbf{u}^{\top}\nabla f(X_t)\mathbf{v}| < \lambda$ , the optimality condition of (7) implies  $\mathbf{u}^{\top}X_t\mathbf{v} = 0$ .
2. If  $\mathbf{u}^{\top}X_{t-1}\mathbf{v} = 0$ , then combined with (17) we know  $\mathbf{u}, \mathbf{v}$  are not in the active subspace, so  $\mathbf{u}^{\top}X_t\mathbf{v} = 0$ .

Therefore, once  $t > T$ , for any  $\mathbf{u} \in (U^*)^{\perp}$  or  $\mathbf{v} \in (V^*)^{\perp}$ ,  $\mathbf{u}^{\top}X_t\mathbf{v}$  will be zero and will never be selected in  $(U_A)_t, (V_A)_t$ . This implies that  $\text{span}((U_A)_t) \subseteq \text{span}(U^*)$  and  $\text{span}((V_A)_t) \subseteq \text{span}(V^*)$ .

Next we prove the equality part. For all  $\mathbf{u}, \mathbf{v}$  such that  $\mathbf{u}^{\top}X^*\mathbf{v} \neq 0$ , there exists a  $T$  such that  $\mathbf{u}^{\top}(X_t)\mathbf{v} \neq 0$  for all  $t > T$  (since the smallest eigenvalue  $> 0$ ). Therefore, all such  $\mathbf{u}, \mathbf{v}$  will belong to  $(U_A)_t, (V_A)_t$  after  $t > T$ . Combined with the previous argument, we have  $\text{span}((U_A)_t) = \text{span}(U^*)$  and  $\text{span}((V_A)_t) = \text{span}(V^*)$  after  $t > T$ .  $\square$

## 6.6. Proof of Theorem 9

*Proof.* We first introduce an important property of the power method, which will be useful for proving the theorem.

The power method (subspace iteration) described in Algorithm 2 has a linear convergence rate: assume  $U, V$  are the top- $k$  singular vectors of  $A$ ,  $\sigma_k, \sigma_{k+1}$  are the  $k$ -th and  $(k+1)$ -st singular values, and the approximate SVD given by Algorithm 2 with  $R$  as initial and with  $T^{max}$  steps. If the initial matrix  $R$  satisfies the condition that  $V^\top R$  is non-singular, then

$$\begin{aligned} \|\hat{U}\hat{U}^\top - UU^\top\| &\leq \left(\frac{\sigma_{k+1}}{\sigma_k}\right)^{T^{max}} \|U_R U_R^\top - UU^\top\|, \\ \|\hat{V}\hat{V}^\top - VV^\top\| &\leq \left(\frac{\sigma_{k+1}}{\sigma_k}\right)^{T^{max}} \|V_R V_R^\top - VV^\top\|. \end{aligned} \quad (18)$$

where  $U_R$  is the orthogonal subspace of  $R$ ,  $V_R$  is the orthogonal subspace of  $AR$ , and  $\hat{U}$  is the subspace after one power iteration. This property is shown in Theorem 7.2 in (Arbenz, 2010).

Now we prove that the sequence  $X_t$  generated by Algorithm 1 converges to the global optimum. For convenience, we define  $P(X) := \mathcal{S}_\lambda(X - \nabla f(X))$ , and  $\hat{P}(X)$  to be the computed value (by the power method with one iteration) of  $P(X)$ . The reduced SVD of  $\mathcal{S}_\lambda(X - \nabla f(X))$  is denoted by  $U_G(X)\Sigma_G(X)(V_G(X))^\top$ , and the computed subspace vectors is  $\tilde{U}_G(X), \tilde{V}_G(X)$ . We use  $\tilde{U}_G(X_t)$  to denote the computed value at the  $t$ -th iteration, and  $U_G(X_t)$  to denote the true subspace vectors at the  $t$ -th iteration.

Since Algorithm 1 ensures that the objective function value decreases at each iteration, the sequence  $\{X_t\}$  is in a compact set. Therefore, there exists a subsequence of  $X_{s_t}$  converges to a limit point  $\bar{X}$ . For convenience we denote  $s_t$  by  $t$  in the following. We want to prove  $\bar{X}$  is the global optimum by contradiction, so we first assume  $\bar{X} \neq X^*$ , so  $P(\bar{X}) \neq \bar{X}$ .

First we want to show  $\tilde{U}(X_t), \tilde{V}(X_t)$  converges to  $U_G(\bar{X}), V_G(\bar{X})$  (the computed subspace converges to the true subspace). Assume  $\tilde{U}_G(X_t), \tilde{V}_G(X_t)$  converges to  $\tilde{U}, \tilde{V}$ , then what we want to show is that  $\text{span}(\tilde{U}) = \text{span}(U_G(\bar{X}))$  and  $\text{span}(\tilde{V}) = \text{span}(V_G(\bar{X}))$ . Since  $\{X_t\}$  converges to  $\bar{X}$  and  $X - \nabla f(X)$  is a continuous function, for any  $\epsilon > 0$  there exists a  $T_1$  such that  $\forall t > T_1$ ,

$$\|(X_t - \nabla f(X_t)) - (\bar{X} - \nabla f(\bar{X}))\| \leq \epsilon. \quad (19)$$

By perturbation theory (Li, 1998), for any matrix  $A$  and a small perturbation  $\Delta$ , we have

$$\begin{aligned} \max(\|U(A)U(A)^\top - U(A+\Delta)U(A+\Delta)^\top\|, \\ \|V(A)V(A)^\top - V(A+\Delta)V(A+\Delta)^\top\|) \leq \|\Delta\|/\delta, \end{aligned}$$

where  $\delta$  is the singular-gap between  $\sigma_k(A)$  and  $\sigma_{k+1}(A)$ , and  $U(A), V(A)$  are the top- $k$  singular vectors of  $A$ . Now we consider  $A = P(\bar{X}), \Delta = P(X_t) - P(\bar{X})$ , then we have

$$\begin{aligned} \max(\|U_G(X_t)U_G(X_t)^\top - U_G(\bar{X})U_G(\bar{X})^\top\|, \\ \|V_G(X_t)V_G(X_t)^\top - V_G(\bar{X})V_G(\bar{X})^\top\|) \leq \|P(X_t) - P(\bar{X})\|/\delta, \end{aligned}$$

Combining with (19) we get

$$\|U_G(X_t)U_G(X_t)^\top - U_G(\bar{X})U_G(\bar{X})^\top\| \leq \frac{\epsilon}{\delta} \quad \forall t > T_1. \quad (20)$$

Now assume  $t$  is large enough so that

$$\|\tilde{U}\tilde{U}^\top - \tilde{U}_G(X_{t-1})\tilde{U}_G(X_{t-1})^\top\| < \epsilon_1, \quad (21)$$

so we have

$$\begin{aligned} &\|\tilde{U}_G(X_t)\tilde{U}_G(X_t)^\top - U_G(\bar{X})U_G(\bar{X})^\top\| \\ &\leq \|\tilde{U}_G(X_t)\tilde{U}_G(X_t)^\top - U_G(X_t)U_G(X_t)^\top\| + \frac{\epsilon}{\delta} \quad (\text{by (20)}) \\ &\leq \left(\frac{\sigma_{k+1}}{\sigma_k}\right)\|\tilde{U}_G(X_{t-1})\tilde{U}_G(X_{t-1})^\top - U_G(X_t)U_G(X_t)^\top\| + \frac{\epsilon}{\delta} \quad (\text{by (18)}) \\ &\leq \left(\frac{\sigma_{k+1}}{\sigma_k}\right)\|\tilde{U}\tilde{U}^\top - U_G(X_t)U_G(X_t)^\top\| + \frac{\epsilon}{\delta} + \epsilon_1. \quad (\text{by (21)}) \\ &\leq \left(\frac{\sigma_{k+1}}{\sigma_k}\right)\|\tilde{U}\tilde{U}^\top - U_G(\bar{X})U_G(\bar{X})^\top\| + 2\frac{\epsilon}{\delta} + \epsilon_1 \quad (\text{by (20)}). \end{aligned}$$

Therefore,

$$\begin{aligned} &\|\tilde{U}_G(X_t)\tilde{U}_G(X_t)^\top - \tilde{U}\tilde{U}^\top\| \\ &\geq \|U_G(\bar{X})U_G(\bar{X})^\top - \tilde{U}\tilde{U}^\top\| \\ &\quad - \|\tilde{U}_G(X_t)\tilde{U}_G(X_t)^\top - U_G(\bar{X})U_G(\bar{X})^\top\| \\ &\geq \left(1 - \frac{\sigma_{k+1}}{\sigma_k}\right)\|\tilde{U}\tilde{U}^\top - U_G(\bar{X})U_G(\bar{X})^\top\| - 2\frac{\epsilon}{\delta} - \epsilon_1. \end{aligned}$$

Taking  $t \rightarrow \infty$  on both side and  $\epsilon, \epsilon_1 \rightarrow 0$  we have

$$0 \geq (1 - \sigma_{k+1}/\sigma_k)\|\tilde{U}\tilde{U}^\top - U_G(\bar{X})U_G(\bar{X})^\top\|.$$

So  $\text{span}(U_G(\bar{X})) = \text{span}(\tilde{U})$ . Using the same derivations on the right singular vectors  $V$ , we can get  $\text{span}(V_G(\bar{X})) = \text{span}(\tilde{V})$ .

The above argument shows that  $\hat{P}(X_t) \rightarrow P(\bar{X})$ . If  $\bar{X}$  is not a global optimum, then  $P(\bar{X}) \neq \bar{X}$ . Since all the fixed points are global optimum, by a typical convergence property for the fixed-point operation we can show that  $\bar{X}$  is a global optimum.

Next, we prove the asymptotic convergence rate. By Theorem 7, we know after finite steps  $T_1$ ,  $U_A(X_t) = U^*, V_A(X_t) = V^*$ . Moreover,  $\sigma_k(X_t - \nabla f(X_t))$  converges to  $\sigma_k(X^* - \nabla f(X^*))$  and  $\sigma_{k+1}(X_t - \nabla f(X_t))$  converges to  $\sigma_{k+1}(X^* - \nabla f(X^*))$ , so there exists a  $T_2$  such that for all  $t > T_2$ ,

$$\frac{\sigma_{k+1}(X_t - \nabla f(X_t))}{\sigma_k(X_t - \nabla f(X_t))} \leq \frac{\lambda - \epsilon/2}{\lambda}. \quad (22)$$

Assume  $\bar{T} = \max(T_1, T_2)$ . Since for each iteration we run one power iteration on  $\bar{X}_t - \nabla f(X_t)$  and the gap of the  $k$ -th and  $(k+1)$ -st singular values are guaranteed in (22), from (18) we can bound the error between subspaces  $(U_A)_t$  and  $U^*$  by

$$\begin{aligned} & \|U_A(X_t)U_A(X_t)^\top - U^*(U^*)^\top\| \\ & \leq (1 - \frac{\epsilon}{2\lambda}) \|U_A(X_{t-1})U_A(X_{t-1})^\top - U^*(U^*)^\top\| \end{aligned}$$

when  $t > \bar{T}$ . Therefore

$$\begin{aligned} & \|U_A(X_{\bar{T}+t})U_A(X_{\bar{T}+t})^\top - U^*(U^*)^\top\| \\ & \leq (1 - \frac{\epsilon}{2\lambda})^t \|U_A(X_{\bar{T}})U_A(X_{\bar{T}})^\top - U^*(U^*)^\top\|. \quad (23) \end{aligned}$$

At the  $t$ -th iteration, it is clear that  $\bar{S}_t = U_A(X_t)^\top X^* V_A(X_t)$  is a feasible solution for the sub-problem (8). Let  $\bar{X}_t = U_A(X_t) \bar{S}_t V_A(X_t)^\top$  then  $F(X_t) \geq F(\bar{X}_t)$  (because  $X_t$  is the minimizer of (8)). Also,  $X^* = U^*(U^*)^\top X^* = X^* V^*(V^*)^\top$ , so

$$\begin{aligned} & \|\bar{X}_t - X^*\| \\ & \leq \|U_A(X_t)U_A(X_t)^\top X^* V_A(X_t) V_A(X_t)^\top - U_A(X_t)U_A(X_t)^\top X^*\| \\ & \quad + \|U_A(X_t)U_A(X_t)^\top X^* - X^*\| \\ & = \|U_A(X_t)U_A(X_t)^\top X^* (V^*(V^*)^\top - V_A(X_t)V_A(X_t)^\top)\| \\ & \quad + \|(U^*(U^*)^\top - U_A(X_t)U_A(X_t)^\top)X^*\| \\ & \leq (\|U^*(U^*)^\top - U_A(X_t)U_A(X_t)^\top\| + \\ & \quad \|V^*(V^*)^\top - V_A(X_t)V_A(X_t)^\top\|) \|X^*\|. \end{aligned}$$

Next we relate this quantity with the objective function value  $F(X_t)$ . From Lemma 3.1 in (Ji & Ye, 2009),

$$F(X) - F(X^*) \leq L \|X - X^*\|_F^2,$$

where  $L$  is the Lipschitz constant for  $\nabla f(X)$ . Substituting  $\bar{X}_t$  into the above inequality we get

$$\begin{aligned} & F(X_t) - F(X^*) \leq F(\bar{X}_t) - F(X^*) \\ & \leq LR (\|U^*(U^*)^\top - U_A(X_t)U_A(X_t)^\top\| \\ & \quad + \|V^*(V^*)^\top - V_A(X_t)V_A(X_t)^\top\|), \end{aligned}$$

where  $R = \|X^*\|$  is a constant. Applying (23) we can get

$$F(X_t) - F(X^*) \leq LR (1 - \frac{\epsilon}{2\lambda})^{t-\bar{T}}$$

when  $t > \bar{T}$ . Therefore our algorithm has an asymptotically linear convergence rate.

□

## 6.7. Implementation Details for the comparison

We discuss the implementation detail for other algorithms in our comparison. The code for Soft-Impute

is downloaded from <http://statweb.stanford.edu/~rahulm/SoftImpute/>. In their code, the top- $k$  singular vectors is computed by Lanczos algorithm. We use the same JSH and SSGD implementation as in (Avron et al., 2012), where the largest singular value is computed by the SVDS function in MATLAB and the parameters are tuned by the authors. More specifically,  $\delta = 0.04$  for ml100k,  $\delta = 0.015$  for ml10m and netflix, and  $\nu = 0.005$  for all datasets. We implement LiftedCD by ourselves and compute the largest singular value by the power method. For MMBS the code is downloaded from <http://www.montefiore.ulg.ac.be/~mishra/software/traceNorm.html>, and the GCG code is downloaded from <http://users.cecs.anu.edu.au/~xzhang/GCG/>.
